# Supplementary material for: Association between age at onset of overweight and risk of hypertension across adulthood
Source: PubMed Central journal article supplement — Heart. 2022 Feb 21;108(9):683–8. doi: 10.1136/heartjnl-2021-320278 (PMC8995813; doi:10.1136/heartjnl-2021-320278), 2022-02-21
Supplement: heartjnl-2021-320278supp001.pdf [file heartjnl-2021-320278supp001.pdf]

## Supplementary material

### **Title: Association Between Age at Onset of Overweight and Risk of Hypertension Across Adulthood**

**Table S1.** Number of imputed missing data

**Table S2.** The proportions of hypertensive patients by hypertension diagnostic criteria

**Table S3.** Sensitivity analysis excluding incident hypertension within the first two years of follow-up (N = 8,564)

**Table S4.** Sensitivity analysis using Cox proportional hazards models (N = 9,484)

**Table S5.** Sensitivity analysis excluding individuals who did not remain overweight following its initial manifestation (N = 6,096)

**Table S6.** Sensitivity analysis excluding overweight individuals who progressed to obesity (N = 9,132)

**Table S7.** Sensitivity analysis adjusting for several time-varying covariates (N = 9,484)

**Table S8.** Sensitivity analysis using International Obesity Task Force of overweight for East Asians (N = 8,440)

**Table S9.** Sensitivity analysis using pattern-mixture model approach to multiple imputation (N = 9,484)

**Figure S1.** Cumulative incidence of hypertension among new-onset overweight cases or matched normal-weight controls

**Figure S2.** The cumulative incidence of hypertension among participants with new-onset overweight versus controls across onset age groups

**Table S1.** Number of imputed missing data

| Variables                        | Missing (%) |
|----------------------------------|-------------|
| Fasting blood glucose            | 111(1.2)    |
| Total cholesterol                | 112(1.2)    |
| Triglycerides                    | 109(1.1)    |
| eGFR                             | 297(3.1)    |
| Parental history of Hypertension | 2(0.02)     |
| Cigarette smoking status         | 153(1.6)    |
| Alcohol consumption status       | 78(0.8)     |
| Physical activity                | 589(6.2)    |
| Education attainment             | 2(0.02)     |

**Table S2.** The proportions of hypertensive patients by hypertension diagnostic criteria

| Hypertension diagnostic criteria                     | N (%)       |
|------------------------------------------------------|-------------|
| Incident total hypertension                          | 2935(100)   |
| Systolic/diastolic blood pressure $\geq$ 140/90 mmHg | 2804(95.54) |
| Self-reported physician diagnosis of hypertension    | 218(7.43)   |
| Antihypertensive drugs use                           | 173(5.89)   |

**Table S3.** Sensitivity analysis excluding incident hypertension within the first two years of follow-up (N = 8,564)

| Overweight Onset Age (years)     | Normal Weight Case/Total | New-Onset Overweight Case/Total | Subhazard Ratio (95%CI) | <i>p</i> value |
|----------------------------------|--------------------------|---------------------------------|-------------------------|----------------|
| Primary analysis (N = 9,484)     |                          |                                 |                         |                |
| 18-39                            | 149/1103                 | 228/1103                        | 1.38(1.11-1.71)         | 0.004          |
| 40-49                            | 291/1255                 | 387/1255                        | 1.27(1.09-1.49)         | 0.002          |
| 50-59                            | 489/1487                 | 627/1487                        | 1.23(1.09-1.38)         | 0.001          |
| $\geq$ 60                        | 364/897                  | 400/897                         | 1.14(0.99-1.32)         | 0.072          |
| Sensitivity analysis (N = 8,564) |                          |                                 |                         |                |
| 18-39                            | 125/1048                 | 188/1048                        | 1.30(1.02-1.66)         | 0.032          |
| 40-49                            | 222/1138                 | 300/1138                        | 1.29(1.08-1.53)         | 0.005          |
| 50-59                            | 389/1322                 | 503/1322                        | 1.22(1.06-1.39)         | 0.004          |
| $\geq$ 60                        | 286/774                  | 306/774                         | 1.10(0.94-1.30)         | 0.239          |

All models were adjusted for systolic blood pressure, fasting blood glucose, total cholesterol, triglycerides, eGFR, parental history of hypertension, cigarette smoking status, alcohol consumption status, physical activity and education attainment.

**Table S4.** Sensitivity analysis using Cox proportional hazards models (N = 9,484)

| Overweight Onset Age (years) | Normal Weight Case/Total | New-Onset Overweight Case/Total | Subhazard Ratio (95%CI) | <i>p</i> value |
|------------------------------|--------------------------|---------------------------------|-------------------------|----------------|
| 18-39                        | 149/1103                 | 228/1103                        | 1.38(1.11-1.71)         | 0.003          |
| 40-49                        | 291/1255                 | 387/1255                        | 1.27(1.09-1.49)         | 0.002          |
| 50-59                        | 489/1487                 | 627/1487                        | 1.23(1.09-1.38)         | <0.001         |
| ≥ 60                         | 364/897                  | 400/897                         | 1.14(0.99-1.32)         | 0.071          |

All models were adjusted for systolic blood pressure, fasting blood glucose, total cholesterol, triglycerides, eGFR, parental history of hypertension, cigarette smoking status, alcohol consumption status, physical activity and education attainment.

**Table S5.** Sensitivity analysis excluding individuals who did not remain overweight following its initial manifestation (N = 6,096)

| Overweight Onset Age (years) | Normal Weight Case/Total | New-Onset Overweight Case/Total | Subhazard Ratio (95%CI) | <i>p</i> value |
|------------------------------|--------------------------|---------------------------------|-------------------------|----------------|
| 18-39                        | 109/816                  | 194/816                         | 1.61(1.25-2.06)         | <0.001         |
| 40-49                        | 203/860                  | 298/860                         | 1.43(1.19-1.72)         | <0.001         |
| 50-59                        | 297/898                  | 440/898                         | 1.40(1.21-1.63)         | <0.001         |
| ≥ 60                         | 204/474                  | 242/474                         | 1.29(1.07-1.57)         | 0.009          |

All models were adjusted for systolic blood pressure, fasting blood glucose, total cholesterol, triglycerides, eGFR, parental history of hypertension, cigarette smoking status, alcohol consumption status, physical activity and education attainment.

**Table S6.** Sensitivity analysis excluding overweight individuals who progressed to obesity (N = 9,132)

| Overweight Onset Age (years) | Normal Weight Case/Total | New-Onset Overweight Case/Total | Subhazard Ratio (95%CI) | <i>p</i> value |
|------------------------------|--------------------------|---------------------------------|-------------------------|----------------|
| 18-39                        | 144/1052                 | 214/1052                        | 1.32(1.06-1.65)         | 0.015          |
| 40-49                        | 276/1210                 | 367/1210                        | 1.27(1.09-1.50)         | 0.003          |
| 50-59                        | 470/1433                 | 599/1433                        | 1.22(1.08-1.37)         | 0.002          |
| ≥ 60                         | 348/871                  | 382/871                         | 1.13(0.97-1.31)         | 0.109          |

All models were adjusted for systolic blood pressure, fasting blood glucose, total cholesterol, triglycerides, eGFR, parental history of hypertension, cigarette smoking status, alcohol consumption status, physical activity and education attainment.

**Table S7.** Sensitivity analysis adjusting for several time-varying covariates (N = 9,484)

| Overweight Onset age (years) | Normal Weight Case/Total | New-Onset Overweight Case/Total | Subhazard Ratio (95%CI) | <i>p</i> value |
|------------------------------|--------------------------|---------------------------------|-------------------------|----------------|
| 18-39                        | 149/1103                 | 228/1103                        | 1.37 (1.08-1.73)        | 0.008          |
| 40-49                        | 297/1255                 | 387/1255                        | 1.27 (1.07-1.49)        | 0.005          |
| 50-59                        | 489/1487                 | 627/1487                        | 1.20 (1.06-1.36)        | 0.004          |
| ≥ 60                         | 367/897                  | 400/897                         | 1.15 (0.99-1.35)        | 0.068          |

Fasting blood glucose, total cholesterol, triglycerides, and eGFR were included as time-varying covariates in the model. All models were adjusted for systolic blood pressure, fasting blood glucose, total cholesterol, triglycerides, eGFR, parental history of hypertension, cigarette smoking status, alcohol consumption status, physical activity and education attainment.

**Table S8.** Sensitivity analysis using International Obesity Task Force of overweight for East Asians (N = 8,440)

| Overweight Onset Age (years) | Normal Weight Case/Total | New-Onset Overweight Case/Total | Subhazard Ratio (95%CI) | <i>p</i> value |
|------------------------------|--------------------------|---------------------------------|-------------------------|----------------|
| 18-39                        | 96/998                   | 163/998                         | 1.38(1.07-1.79)         | 0.015          |
| 40-49                        | 233/1168                 | 275/1168                        | 1.19(1.00-1.42)         | 0.055          |
| 50-59                        | 384/1304                 | 449/1304                        | 1.16(1.11-1.33)         | 0.035          |
| ≥ 60                         | 269/750                  | 349/750                         | 1.31(1.11-1.54)         | 0.001          |

All models were adjusted for systolic blood pressure, fasting blood glucose, total cholesterol, triglycerides, eGFR, parental history of hypertension, cigarette smoking status, alcohol consumption status, physical activity and education attainment.

**Table S9.** Sensitivity analysis using pattern-mixture model approach to multiple imputation (N = 9,484)

| Overweight Onset Age (years) | Normal Weight Case/Total | New-Onset Overweight Case/Total | Subhazard Ratio (95%CI) | <i>p</i> value |
|------------------------------|--------------------------|---------------------------------|-------------------------|----------------|
| 18-39                        | 149/1103                 | 228/1103                        | 1.38(1.11-1.71)         | 0.004          |
| 40-49                        | 291/1255                 | 387/1255                        | 1.27(1.09-1.49)         | 0.002          |
| 50-59                        | 489/1487                 | 627/1487                        | 1.23(1.09-1.38)         | 0.001          |
| ≥ 60                         | 364/897                  | 400/897                         | 1.14(0.99-1.32)         | 0.073          |

All models were adjusted for systolic blood pressure, fasting blood glucose, total cholesterol, triglycerides, eGFR, parental history of hypertension, cigarette smoking status, alcohol consumption status, physical activity and education attainment.

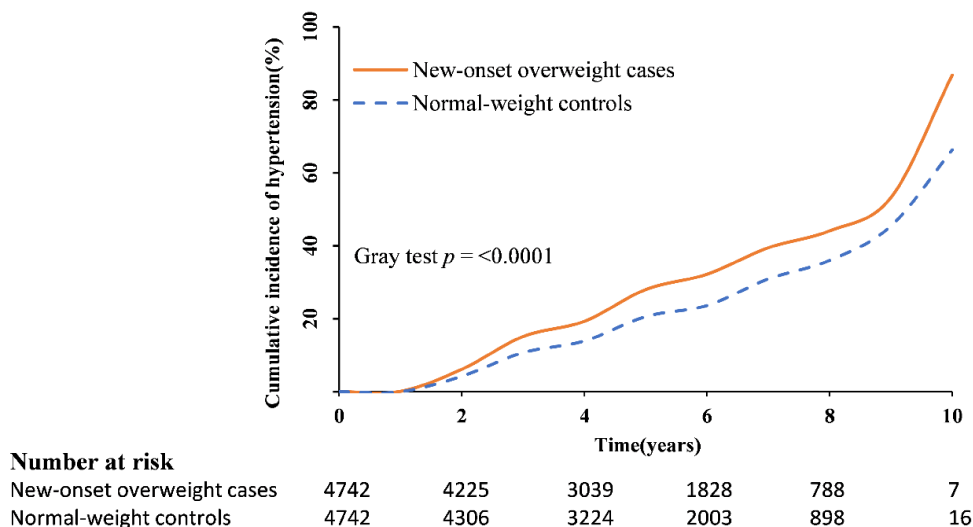

**Figure S1.** Cumulative incidence of hypertension among new-onset overweight cases or matched normal-weight controls.

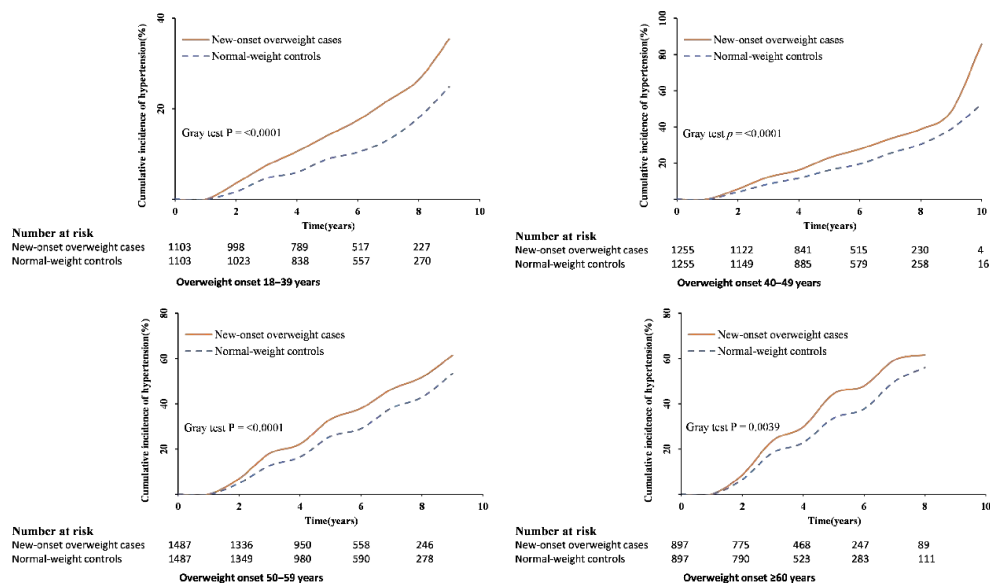

**Figure S2.** The cumulative incidence of hypertension among participants with new-onset overweight versus controls across onset age groups
